# Supplementary material
Source: Springer Nature journal article supplement (https://www.springermedizin.de/resource/supplementary/12874_2011_600_MOESM2_ESM.pdf/9432556)
Supplement: MOESM2 [file 9432556]

Formal Translation of Edinburgh Claudication Questionnaire by Applied Language Solutions\* into Punjabi, Urdu, Bengali, Hindi, Gujarati version 1.0 (Translator 1)

Translation discussed amongst group of 3 bilingual healthcare professionals and lay persons

Amendments made and agreed upon by aforementioned group

Amendments sent back to translator 1 and version 2.0 produced

Version 2.0 checked by aforementioned group

Version 2.0 sent to Applied Language Solutions\* (Translator 2) to be back-translated into English

Version 2.0 compared with original ECQ for grammatical/ semantic equivalence by researcher team

If acceptable version 2.0 was used in validation exercise

\* [www.appliedlanguage.com/](http://www.appliedlanguage.com/)
